# Supplementary material for: The Rilp-like proteins Rilpl1 and Rilpl2 regulate ciliary membrane content
Source: PubMed Central journal article supplement — Mol Biol Cell. 2013 Feb 15;24(4):453–64. doi: 10.1091/mbc.E12-08-0598 (PMC3571868; doi:10.1091/mbc.e12-08-0598), 2013-02-15
Supplement: supp_E12-08-0598v1_CombinedSupMats.pdf [file supp_E12-08-0598v1_CombinedSupMats.pdf]

## Supplemental Material

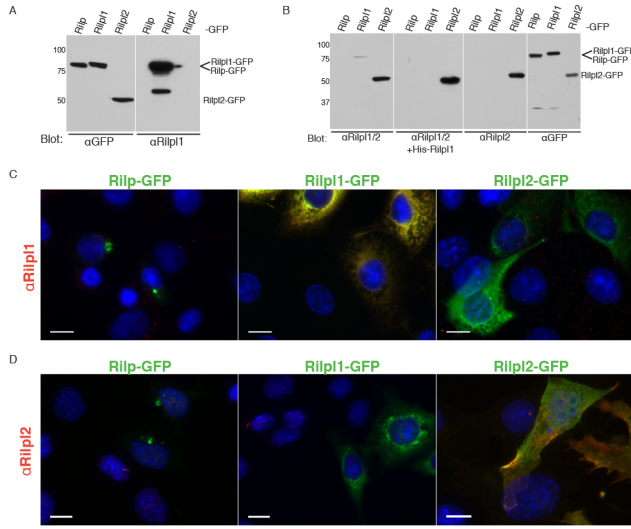

**Figure S1.** Testing of Rilp1 and Rilp2 antibodies. (A) Lysates from HEK293T cells transiently transfected with GFP tagged Rilp family proteins were probed for Rilp1 and GFP. Numbers to the left are molecular weights in kilodaltons. Note that anti-Rilp1 antibody only recognizes Rilp1-GFP. (B) Lysates from HEK293T cells transiently transfected with GFP tagged Rilp family proteins were probed for Rilp2 and GFP. Numbers to the left are molecular weights in kilodaltons. Note that anti-Rilp1/2 antibody recognizes both Rilp1 and Rilp2, where as anti-Rilp2 only recognizes Rilp2-GFP. (C) Representative immunofluorescence images of IMCD3 cells transiently transfected with GFP-tagged Rilp family proteins, fixed, and stained for GFP (green), Rilp1 (red), and DNA (DAPI, blue). Bars, 10  $\mu$ m. Rilp1 antibody only recognizes Rilp1-GFP. (D) Representative immunofluorescence images of IMCD3 cells transiently transfected with GFP-tagged Rilp family proteins, serum starved for 24 hrs, fixed, and stained for GFP (green), Rilp2 (red), and DNA (DAPI, blue). Rilp2 antibody only recognizes Rilp2-GFP. Bars, 10  $\mu$ m.

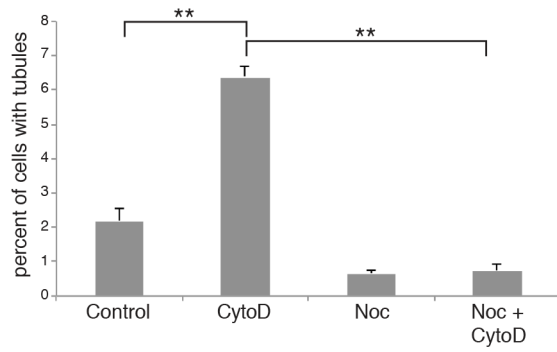

**Figure S2.** Rilp12 tubules are dependent on microtubule and actin dynamics. Quantification of the frequency of Rilp12-LAP tubule formation in serum starved IMCD3 cells treated with vehicle or 1  $\mu$ M cytochalasin D (CytoD) for 30 min with or without pre-treatment with 5  $\mu$ g/ml nocodazole (Noc). Results shown are the mean of three independent experiments  $\pm$  SEM. (500 cells/experiment, \*\* $p < 0.01$ , t-test).

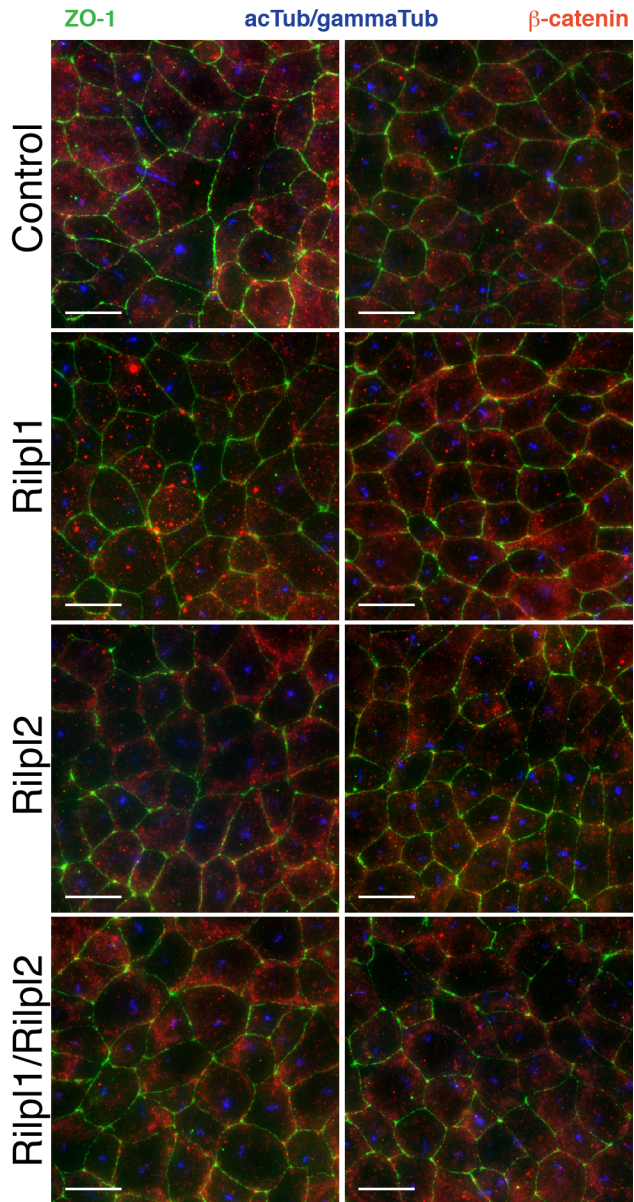

**Figure S3.** Polarization of Rilp-like protein depleted cells. Representative immunofluorescence images of IMCD3 cells depleted of the indicated protein(s) grown on trans-well filters and stained for ZO-1 (apical junction, green), beta catenin (basolateral surface, red), and gamma and acetylated tubulins (centrosomes and cilia, blue). Images are maximum projections of z-stacks. Bars, 10  $\mu\text{m}$ .

**Movie S1.** Dynamic localization of Rilpl2-LAP to a primary cilium. Movie shows GFP fluorescence and tdTomato fluorescence in an IMCD3 cell expressing Rilpl2-LAP and tdTomato-inversin (cilium) (Figure 4A). Total time lapsed is 90 min; movie plays at 600x real time.

**Movie S2.** Rilpl2-LAP forms dynamic tubulovesicular structures. Movie shows GFP fluorescence in an IMCD3 cell expressing Rilpl2-LAP (Figure 4B). Each frame is the maximum projection of a deconvolved z-stack. Total time lapsed is ~ 5 min; movie plays at 68x real time.

**Movie S3.** Rilpl2-LAP forms dynamic tubulovesicular structures at the base of a primary cilium. Movie shows GFP fluorescence and tdTomato fluorescence in an IMCD3 cell expressing Rilpl2-LAP and tdTomato-inversin (cilium) (Figure 4D). The proximal end of the cilium is on the left. Total time lapsed is 50 min; movie plays at 300x real time.
